# Supplementary material for: Binding of protofibrillar Aβ trimers to lipid bilayer surface enhances Aβ structural stability and causes membrane thinning
Source: Royal Society of Chemistry journal article supplement (doi:10.1039/c7cp05959k), 2017-01-01
Supplement: c7cp05959k1.pdf [file c7cp05959k1.pdf]

## Supplementary Materials

### Binding of protofibrillar A $\beta$ trimers to lipid bilayer surface enhances A $\beta$ structural stability and causes membrane thinning

Xuewei Dong,<sup>a</sup> Yunxiang Sun,<sup>a</sup> Guanghong Wei,<sup>\*a</sup> Ruth Nussinov<sup>bc</sup> and Buyong Ma<sup>\*b</sup>

<sup>a</sup> State Key Laboratory of Surface physics, Key Laboratory for Computational Physical Science (Ministry of Education), and Department of Physics, Collaborative Innovation Center of Advanced Microstructures (Nanjing), Fudan University, Shanghai 200433, People's Republic of China. E-mail: ghwei@fudan.edu.cn.

<sup>b</sup> Basic Science Program, Leidos Biomedical Research, Inc. Cancer and Inflammation Program, National Cancer Institute, Frederick, Maryland 21702, USA. E-mail: mabuyong@mail.nih.gov

<sup>c</sup> Sackler Inst. of Molecular Medicine, Department of Human Genetics and Molecular Medicine, Sackler School of Medicine, Tel Aviv University, Tel Aviv 69978, Israel.

**This material contains five supplementary figures.**

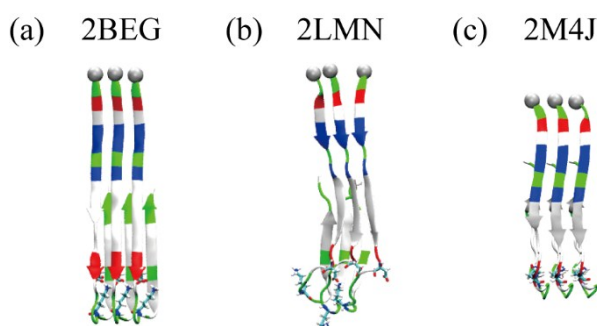

**Fig. S1** Snapshots showing the four surfaces of the three protofibrillar A $\beta$  trimers derived from solid-state NMR fibrils<sup>1-3</sup>: 2BEG (a), 2LMN (b) and 2M4J (c). The surface in the outside of the trimer is  $\beta_1$  surface and the surface in the back represents  $\beta_2$  surface. The surfaces in the right and left of the protofibrillar A $\beta$  trimer represent the face and back surfaces, respectively. It is noted that  $\beta_1$  region and  $\beta_2$  region are staggered. Thus the face surface and the back surface are not symmetric. The A $\beta$  trimer is shown in cartoon representation, with basic residues in blue, acidic residues in red, polar residues in green and non-polar residues in white. The C $\alpha$  atom of each G9 residue is denoted by a silver sphere. D23 and K28 residues are represented in licorice.

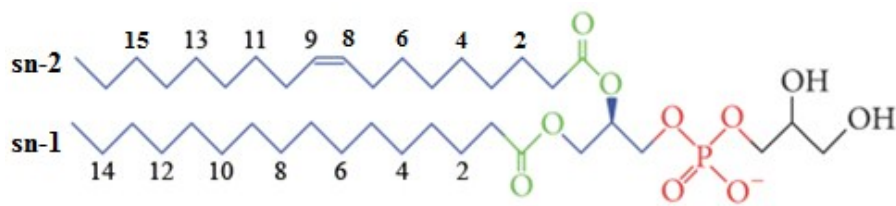

**Fig. S2** Molecular structure of a POPG lipid molecule. Different lipid groups are colored differently: glycerol in black, phosphate group in red, ester group in green, and other carbon atoms in blue. The carbon atoms in the acyl chains (*sn*-1 and *sn*-2) are labelled by numbers.

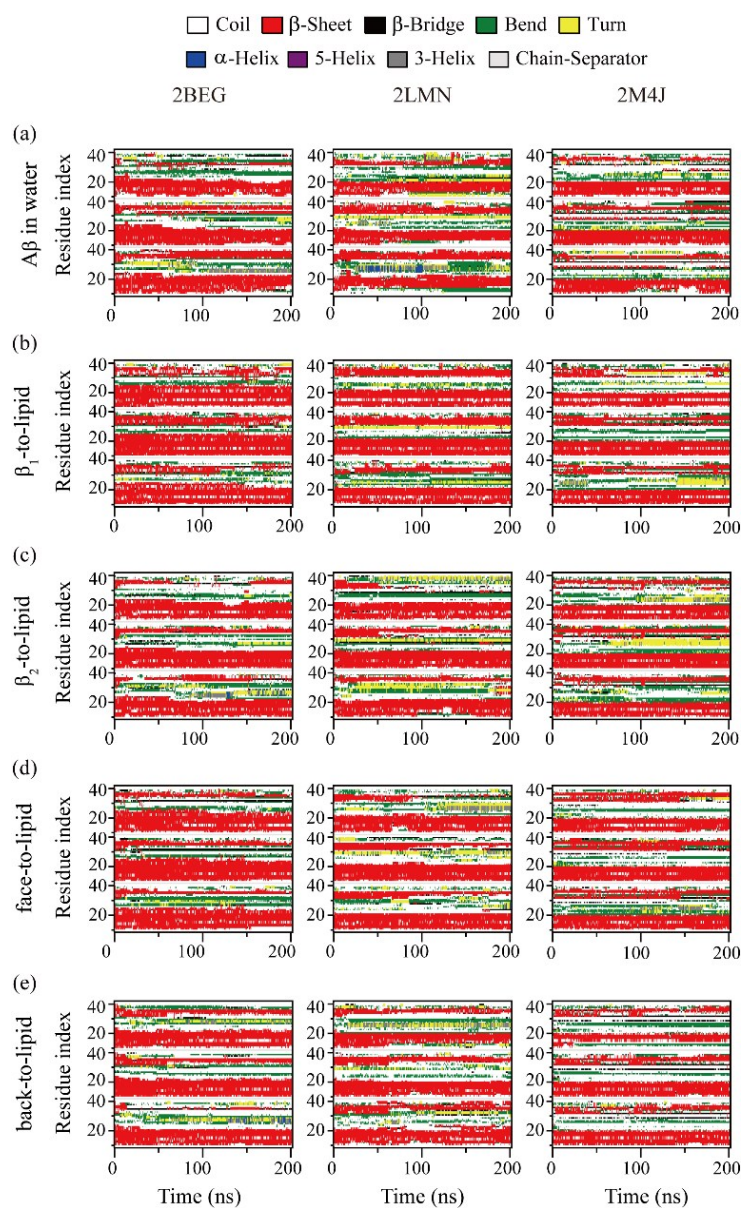

**Fig. S3** Secondary structure of each residue for  $A\beta_{9-40}$  trimer with and without the POPG bilayer as a function of simulation time.

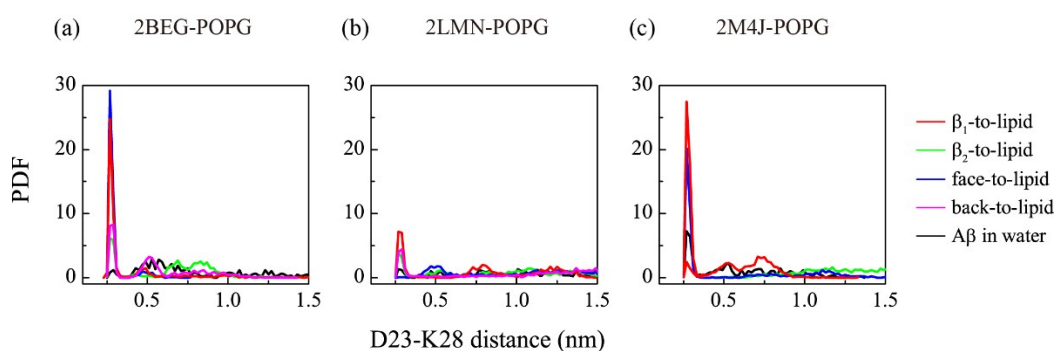

**Fig. S4** Probability density distribution of the D23 to K28 distance in each MD run for each A $\beta$  and A $\beta$ -POPG systems. The PDF was calculated using the last 50 ns data of each MD run.

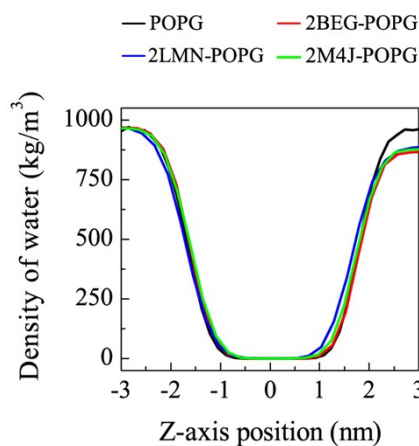

**Fig. S5** Density distribution of water molecules in each A $\beta$ -POPG system. For comparison, the water density distribution in a pure POPG bilayer is also given. The z-position of the membrane center is at z=0 nm. The protofibrillar A $\beta$  trimer binds on the upper surface (z = ~1.7 nm) of the POPG bilayer.

## References

1. T. Luhrs, C. Ritter, M. Adrian, D. Riek-Loher, B. Bohrmann, H. Dobeli, D. Schubert and R. Riek, *Proceedings of the National Academy of Sciences of the United States of America*, 2005, **102**, 17342-17347.
2. A. K. Paravastu, R. D. Leapman, W. M. Yau and R. Tycko, *Proceedings of the National Academy of Sciences of the United States of America*, 2008, **105**, 18349-18354.
3. J. X. Lu, W. Qiang, W. M. Yau, C. D. Schwieters, S. C. Meredith and R. Tycko, *Cell*, 2013, **154**, 1257-1268.
